# Supplementary material for: Unequal consequences of Covid 19: representative evidence from six countries
Source: PubMed Central journal article supplement (PMC8025452; doi:10.1007/s11150-021-09560-z), 2021-04-07
Supplement: 11150_2021_9560_MOESM2_ESM.pdf [file 11150_2021_9560_MOESM2_ESM.pdf]

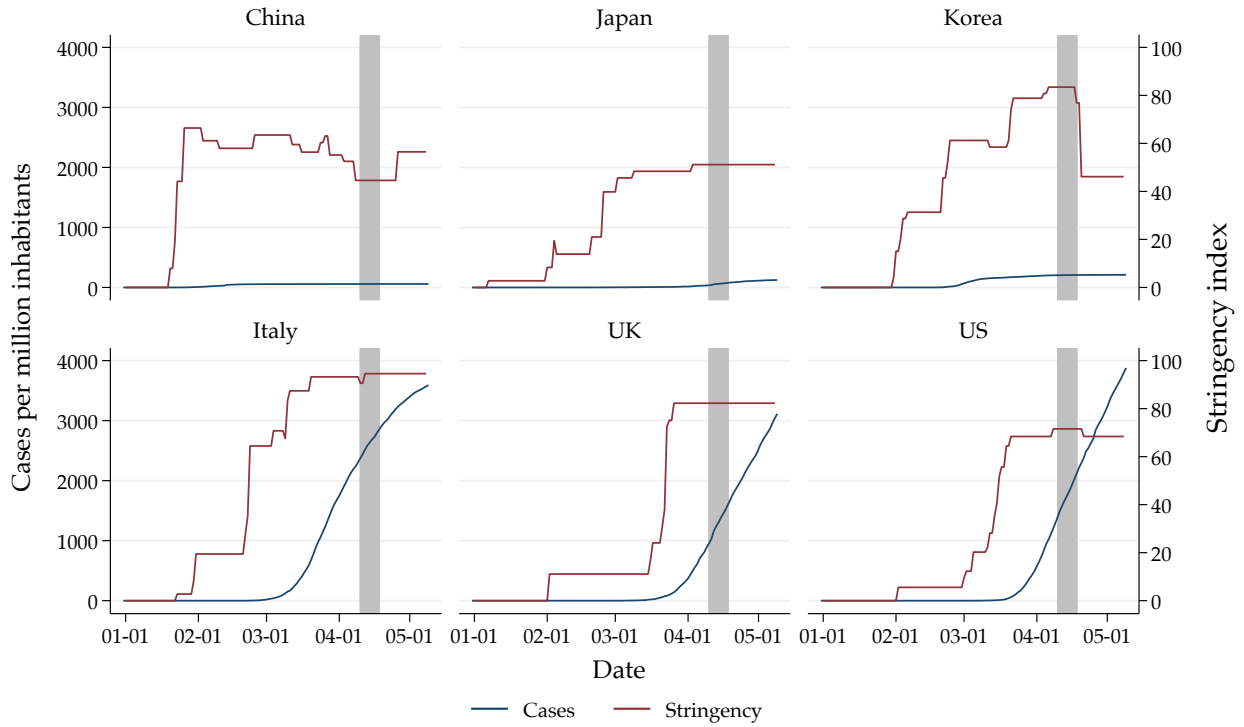

Note: The gray bar represents the third week of April 2020, in which the survey was conducted. Source: Hale et al. (2020).

Figure A1: Time series of the number of confirmed cases and stringency index of government responses

1  
2  
3  
4  
5  
6  
7  
8  
9  
10  
11  
12  
13  
14  
15  
16  
17  
18  
19  
20  
21  
22  
23  
24  
25  
26  
27  
28  
29  
30  
31  
32  
33  
34  
35  
36  
37  
38  
39  
40  
41  
42  
43  
44  
45  
46  
47  
48  
49  
50  
51  
52  
53  
54  
55  
56  
57  
58  
59  
60  
61  
62  
63  
64  
65

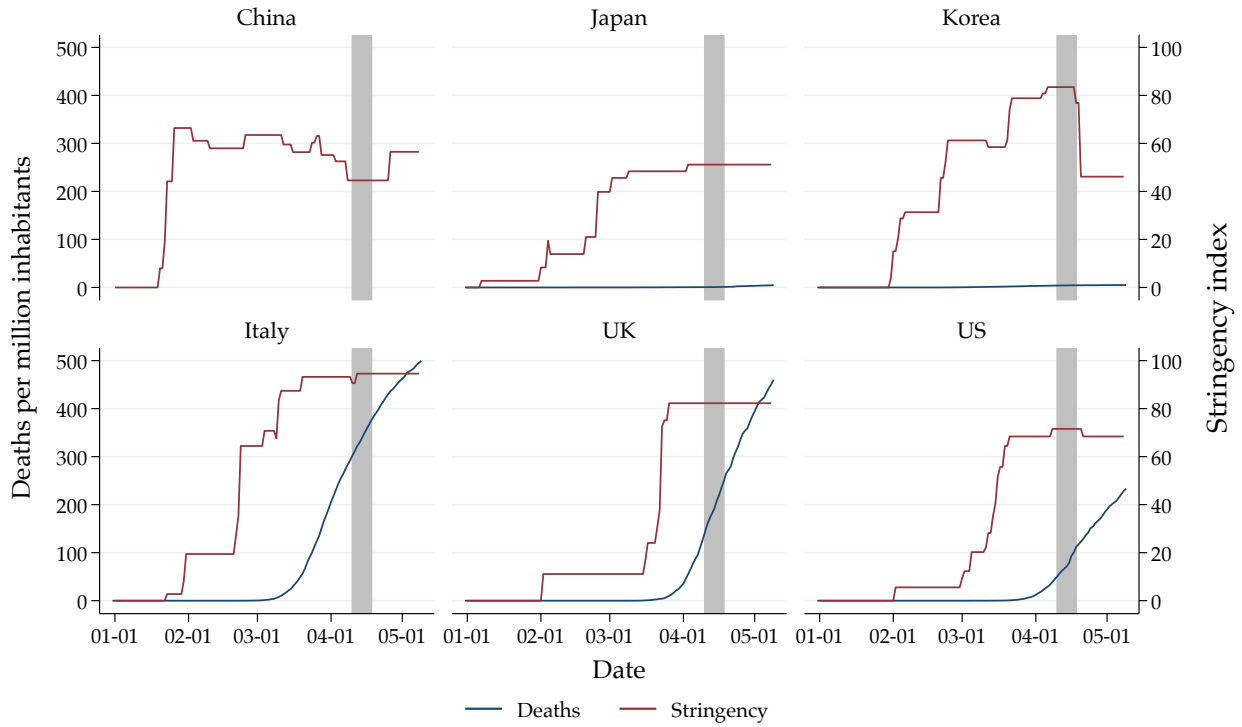

Note: The gray bar represents the third week of April 2020, in which the survey was conducted. Data on deaths from China is not available. Source: Hale et al. (2020).

Figure A2: Time series of the number of Covid-19 related deaths and stringency index of government responses
